# Supplementary material for: Biomarkers of Renal Function and Cognitive Impairment in Patients With Diabetes
Source: PubMed Central journal article supplement — Diabetes Care. 2011 Jul 16;34(8):1827–32. doi: 10.2337/dc11-0186 (PMC3142061; doi:10.2337/dc11-0186), 2011-07-16
Supplement: supp_dc11-0186v110186_DC110186SupplementaryData.pdf [file supp_dc11-0186v110186_DC110186SupplementaryData.pdf]

## SUPPLEMENTARY DATA

### **Members of the Action to Control Cardiovascular Risk in Diabetes (ACCORD) Memory in Diabetes (MIND) Study Group**

*Coordinating Center.* Wake Forest University School of Medicine, Winston-Salem, North Carolina: J Williamson, M Mille, L Coker, J Lovato, L Lovato, J Hepler, D Felton, L Andrews, S Mayer, C Carter, N Woolard. *Magnetic Resonance Imaging (MRI) Reading Center.* Department of Radiology, University of Pennsylvania, Hospital of the University of Pennsylvania, Philadelphia, Pennsylvania. RN Bryan, L Desiderio, C Davatzikos, M Bilello, E Melhem, D Koka, E Parmpi, H Battapady, G Erus.

*Canadian Clinical Center Network.* Population Health Research Institute, Hamilton Health Sciences/McMaster University, Canadian Diabetes Outcome Researchers (CANDOR Network), Hamilton, Ontario: HC Gerstein, S Yusuf, S Capes, Z Punthakee, T Cukierman-Yaffe, M Vallis, S Hall, P Mackie, V Reiding, R Russo, B Tadeson, K Thompson. MIND: HC Gerstein, T Cukierman-Yaffe.

*Canadian Clinical Sites.* McMaster Medical Centre, Hamilton, Ontario: S Capes, Z Punthakee, A Smith, T Valla; Memorial University of Newfoundland, St. John's, Newfoundland: C Joyce, M Parsons, B Rowe; St. Joseph's Health Care London, London, Ontario: I Hramiak, M Gehring, S Tereschyn; Ottawa Hospital, Division of Endocrinology and Metabolism, Ottawa, Ontario: H Lochnan, J Maranger, M McLean, R Sigal; Winnipeg Regional Health Authority, Health Science Center, Diabetes Research Group, Winnipeg, Manitoba: V Woo, L Berard, T Anderlic, A Bernard, A Mawani; Queen Elizabeth II Health Sciences Centre, Halifax, Nova Scotia: C Abbott, E Ur, G McCarthy, M Yuille, H Murdock, T Palmer, AM Patterson.

*Minnesota-Iowa Clinical Center Network.* Berman Center for Outcomes and Clinical Research, Minneapolis, Minnesota: RH Grimm, Jr, BR Kirpach, MM Bartkoske, CM Boyce, N Druckman, AM Gillett, JA Levin, GJ Livingston, AM Murray, KL Margolis, C Truwit. MIND: AM Murray, GJ Livingston, KL Margolis. MIND MRI: C Truwit, AM Murray, GJ Livingston. *Minnesota-Iowa Clinical Sites.* Hennepin ACCORD Clinic, Minneapolis, Minnesota: S Kempainen, M Madden, K Hall, K Wood; International Diabetes Center, Minneapolis, Minnesota: R Bergenstal, R Cuddihy, B Davick, S List, D Whipple, C Ashanti, D Kendall; University of Minnesota, Minneapolis, Minnesota: ER Seaquist, MV Mech, LE Benedict, DJ Demmon, AF Kumar, SM Martinson, SA Miller, C Pease, JP Rao, JB Redmon, JE Swanson, JK Wimmer, Y Okorochoa, M Stiles, C Kodl, C Chadha; University of Minnesota, Phalen Village Clinic, St. Paul, Minnesota: KA Peterson, LA Seaquist, C Boese, TJ Mendenhall, AM Peterson, A Rudelt, TM Schrock; Riverside Health Partners Clinic, Department of Endocrinology, Minneapolis, Minnesota: JM Sperl-Hillen, PJ O'Connor, ME Busch, A Chung, BK Klein, N Krugen, T Bunkers-Lawson, HL Ekstrom, HS Gunderson, BM Johnson, JH MacIndoe, DJ Prewedo, JL Rawl, CM Roethke, M Quinlan, CR Fox, BM Bate, QT Cao, MM Ohnstad, PJ Meyers; University of Iowa, Health Care Diabetes Clinical Research and Programs, Iowa City, Iowa: WI Sivitz, SM Wayson, TA Lower, KA Ochs, D Wells.

*Northeastern Clinical Center Network.* Columbia University College of Physicians and Surgeons, New York, New York: R Lazar, K Slane, CR Lopez-Jimenez. MIND: RM Lazar, K Slane, CR Lopez-Jimenez, J Hirsch, T Brown. MIND MRI: Columbia University Medical Center, New York, New York: J Hirsch, TR Brown, SM Dashnaw, J Cruz-Lobo. *Northeastern Clinical Sites.* Jacobi Medical Center, Bronx, New York: UK Schubart, J Russo, N Vincenty, K Ibarando; Albert Einstein General Clinical Research Center, Bronx, New York: MH Alderman, L Carroll, MJ Sanguily, AC Mayer, L Ramos; Cornell Internal Medicine Associates, New York, New York: D Brillon, J Cordero, R Chiong, K Hyams, C Charles; The Cooper Health System, Cherry Hill, New Jersey: A Bastien, S Grudzinski, P Niblack, L Abreu, K Brown, M Casale, D Dougherty, D Linneman, MA Salvador, P Zee, D Hyman, D Atabek, J Miranda, I Kumar, C Baker; Great Lakes Medical Clinic Research, Westfield, New York: DF Brautigam, R Fischer, DM Scharf, E Brautigam, B Nunn, JM Chiarot, C Flanders; Naomi Berrie Diabetes Center, New York, New York: R Goland, P Kringas, J Montes, J Belle; Ambulatory Care Network at Columbia University, New York, New York: A Getaneh, J Ramirez, G Kranwinkel, E

## SUPPLEMENTARY DATA

Vasquez; Irving Diabetes Research Unit, New York, New York: DS Donovan, G Febres, C Hernandez, MA Jonaitis, C Lopez-Jimenez; State University of New York Downstate Medical Center, Brooklyn, New York: MA Banerji, M Norton, P Patel, S Hirsch; Kings County, Brooklyn, New York: MA Banerji, M Norton, P Patel, S Hirsch.

*Ohio-Michigan Clinical Center Network.* Case Western Reserve University, Division of Clinical and Molecular Endocrinology, Cleveland, Ohio: S Genuth, F Ismail-Beigi, M Thibonnier, L Vargo, C Kelly, T Bongorno, A Dolish, L Pavlik, M Tiktin, S Isteitieh, A Bartlett, K Yee, T Kulow. MIND: K Horowitz, L Pavlik, A Dolish, M Tiktin. MIND MRI: University Hospitals of Cleveland, Department of Radiology, Cleveland, Ohio: J Sunshine, M Clampitt. *Ohio-Michigan Clinical Sites.* University Hospitals of Cleveland, Division of Endocrinology, and University Hospitals Westlake Medical, Cleveland, Ohio: F Ismail-Beigi, A Krikorian, L Moore, L Richardson, E Coles-Herman, J Frankino, A Sood, L Hustak, M Julius, L Pavlik, T Ross, L Long, MK Sullivan, L Strauss, K Behm, F Eskandari, C Hall, D Hayes, K Horowitz, S Isteitieh, Z Madhun, E Seeholzer, J Shina, H Taylor, A Schnall; St. Vincent Charity Hospital, Lipid Research Center, Cleveland, Ohio: LS Sadler, M Griffith, A Hornsby, K Klyn, E Ospelt, L Long, M DeSmit, P McCann, NP Schmidt, T Kulow, J Zaletal; University Suburban Health Center, South Euclid, Ohio: AM Schnall, L Dragmen, R Ellert, J Smith, J Leksan, T Sussman; Cleveland Veterans Affairs Medical Center, Department of Medicine, and Ravenna Community Based Outpatient Clinic, Cleveland, Ohio: F Ismail-Beigi, L Hustak, M Julius, W Schwing, C Hall, K Horowitz, S Isteitieh, C Johnson, E Kern, MA Richmond, L Richardson, K Roberts, J Shina, P Suhan, H Taylor, S Watts, J Martin, GJ Strauss; Medical University of Ohio, Department of Medicine, Ruppert Health Center, Toledo, Ohio: B Akpunonu, R Franco-Saenz, J Gilmore, M Gilmore, P Ross, B Bauer, R Pop-Busui, J Roman, Z Blust; Henry Ford Health System–New Center One, Detroit, Michigan: A Thomas, DM Kahkonen, T Cushman, M Roman, AM Stys, K White, M Austin, C Chatterton, JK Francis, C Jones, D Kruger, A McLellan, F Whitehouse, E Higgins, S Levy, A Schoenherr.

*Southeastern Clinical Center Network.* Wake Forest University School of Medicine, Department of Public Health Sciences, Winston-Salem, North Carolina: DC Goff, Jr, JH Summerson, L Crago, CS Blackwell, A Bertoni, RL Blaine, JK Kirk, RL Spach, J Williamson, J Calles, J Katula, DB Wishnietsky, N Woolard, S Mayer, L Gordineer. MIND: J Williamson, N Woolard, J Ding. MIND MRI: Wake Forest University School of Medicine, Center for Biomolecular Imaging, Winston-Salem, North Carolina. S Kaminsky, D Fuller. *Southeastern Clinical Sites.* Duke University Medical Center, Durham, North Carolina: MN Feinglos, J Jones, G Gedon-Lipscomb; Wake Forest University School of Medicine, Department of Geriatrics/Gerontology, Winston-Salem, North Carolina: HH Atkinson, J Stanfield, T Delvalle-Fagan; Downtown Health Plaza, Winston-Salem, North Carolina: CF Pedley, S Mauney; University of North Carolina, Diabetes Care Center, Chapel Hill, North Carolina: JB Buse, MD Duclos, RE Kirby, A Goley, K Vukojcic; Holston Medical Group, Kingsport, Tennessee: JL Miller, W Besterman, SM Norton, M Surgener; Carolinas Medical Center Family Practice, Charlotte, North Carolina: M Dulin, T Barringer, C Morris, S Norton; Robeson Health Care Corporation, Fairmont Clinic, Fairmont, North Carolina: R Peace, DO Stuart, J Strickland, L Cummings, J Stanfield; Robeson Health Care Corporation, Julian T. Pierce Clinic, Pembroke, North Carolina: R Peace, J Strickland, L Cummings, J Stanfield; Wake Forest University School of Medicine, Departments of Internal Medicine and Endocrinology, Winston-Salem, North Carolina: JR Crouse, J Ellis; Tulane University Health Science Center, New Orleans, Louisiana: V Fonseca, J John-Kalarickal, SM Leger, K Munshi; Kaiser Permanente, Crescent Medical Center, Tucker, Georgia: J Barzilay, K Bader, M Elay.

*Western Clinical Center Network.* University of Washington, Seattle, Washington: JL Probstfield, MD Sullivan, C Kingry, JM Johnson, AS Line, MA Corson, R Knopp, E Lipkin, C Griswold, K Liebert, A Brown, D Juliano, EM Kurashige, S Moberg, J Leader. MIND: University of Washington, Seattle, Washington: MD Sullivan, JM Johnson. *Western MIND Sites.* Northridge Hospital Medical Center, Cardiovascular Center, Northridge, California: M Ariani, H Gutierrez; University of Washington Medical Center at Roosevelt, Family Medical Center, Seattle, Washington: R Failor, A Ellsworth, N Jackson, K Capoccia; Idaho State University, Department of Family Medicine, Pocatello, Idaho: R

## SUPPLEMENTARY DATA

Force, M Macdonald, S Koester, K Pettingill; Naval Medical Center San Diego, Cardiology Division, San Diego, California: P Linz, P Pepper, S Griffin, J Kozlowski, M Engle, P Gutierrez; Oregon Health and Science University, Section of Diabetes, Portland, Oregon: M Riddle, PA McDaniel, SC Gammell-Matthews, B MacNeil, S DesRochers, R Swift; Washington State University, Spokane, Washington: C Wysham, D Weeks, L Kuntsmann; Kaiser Endocrine Clinic, San Diego, California: J Dudl, P Wu, L Lyons, B House, M Murray, A Palma, R Stevenson; Whittier Institute for Diabetes, Clinical Trials Department, La Jolla, California: G Dailey, A Philas-Tsimikas, A Giannella, A Bravo-Medina, M Jacobson, E Farro, S Cruz, N Juarez, C. Dadkhah.
